# Supplementary material for: In situ three-dimensional imaging of strain in gold nanocrystals during catalytic oxidation
Source: Royal Society of Chemistry journal article supplement (doi:10.1039/c9na00231f), 2019-01-01
Supplement: c9na00231f1.pdf [file c9na00231f1.pdf]

## ***In situ* Three-Dimensional Imaging of Strain in Gold Nanocrystals During Catalytic Oxidation**

Ana F. Suzana<sup>ab</sup>, Amélie Rochet<sup>a\*</sup>, Aline R. Passos<sup>a</sup>, João P. Zerba<sup>a</sup>, Carla C. Polo<sup>a</sup>, Celso V. Santilli<sup>b</sup>, Sandra H. Pulcinelli<sup>b</sup>, Felisa Berenguer<sup>c</sup>, Ross Harder<sup>d</sup>, Evan Maxey<sup>d</sup>, Florian Meneau<sup>a\*</sup>

<sup>a</sup> Brazilian Synchrotron Light Laboratory (LNLS), Brazilian Center for Research in Energy and Materials (CNPEM), 13083-970, Campinas, SP, Brazil.

<sup>b</sup> Instituto de Química, UNESP, Rua Professor Francisco Degni, 14800-900 Araraquara, SP, Brazil.

<sup>c</sup> Synchrotron SOLEIL, L'Orme des Merisiers, BP48, Saint Aubin, 91192 Gif-sur-Yvette, France.

<sup>d</sup> Advanced Photon Source, Argonne National Laboratory, 9700 South Cass Avenue, Argonne, IL 60439, USA.

### **Supporting Information**

Surface stress determination.

Fig. S1. Scanning transmission electron microscopy images of the Au/TiO<sub>2</sub> nanoparticles.

Fig. S2. SAXS pattern of the synthesised gold nanoparticles and its fit.

Fig. S3. Averaged line profiles.

Fig. S4. *In situ* Bragg coherent X-ray diffraction imaging.

Fig. S5. Mass spectrometry signal.

Fig. S6. Displacement map from a cross section of the Au nanocrystal at 200 and 400 °C under CO/O<sub>2</sub>.

Fig. S7. Line scan of the phase at 400 °C under air.

Movie S1: 3D view of the gold nanocrystal at RT in 1 bar of CO/O<sub>2</sub>.

Movie S2: 3D view of the gold nanocrystal at 400 °C in 1 bar of CO/O<sub>2</sub>.

### Surface stress determination.

The surface stress  $\sigma_s$  can be estimated by the Young-Laplace equation:<sup>1</sup>

$$\sigma_s = -\frac{3K}{2} \frac{\Delta a}{a} \quad (1)$$

where  $K = 220 \text{ GPa}$  is the bulk modulus of gold,  $R$  the radius of the locally rounded region and  $\frac{\Delta a}{a}$  the strain. The strain at the position indicated by the grey arrow of Fig. 2b is  $-3.7 \cdot 10^{-4}$  for the nanocrystal under air and  $2.6 \cdot 10^{-4}$  in  $\text{CO/O}_2$ . We can estimate the radius  $R$  of the locally rounded region is 20 nm. Equation (1) leads to a surface stress of  $2.4 \pm 0.3 \text{ N}\cdot\text{m}^{-1}$  for the nanocrystal under air, typical of tensile surface stress of metals in the range of  $2 \text{ N}\cdot\text{m}^{-1}$ .<sup>1,2</sup> On the other hand, the surface stress of the nanocrystal under  $\text{CO/O}_2$  turns to be compressive and equals to  $-1.7 \pm 0.1 \text{ N}\cdot\text{m}^{-1}$ .

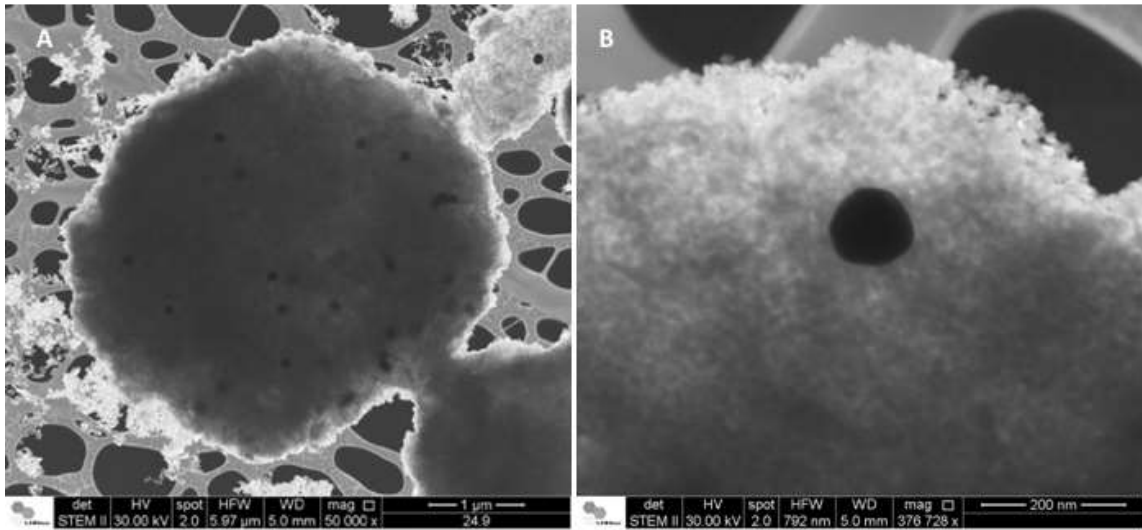

**Fig. S1.** Scanning transmission electron microscopy images of the Au/TiO<sub>2</sub> nanoparticles. (a) Low-magnification and (b) high-magnification.

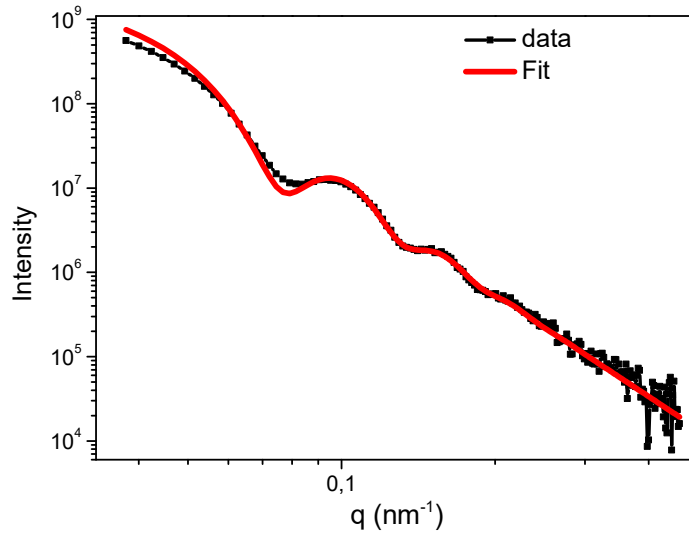

**Fig. S2.** SAXS pattern (black) of the synthesised gold nanoparticles and its fit (red) obtained with a sphere form factor and log-normal distribution.

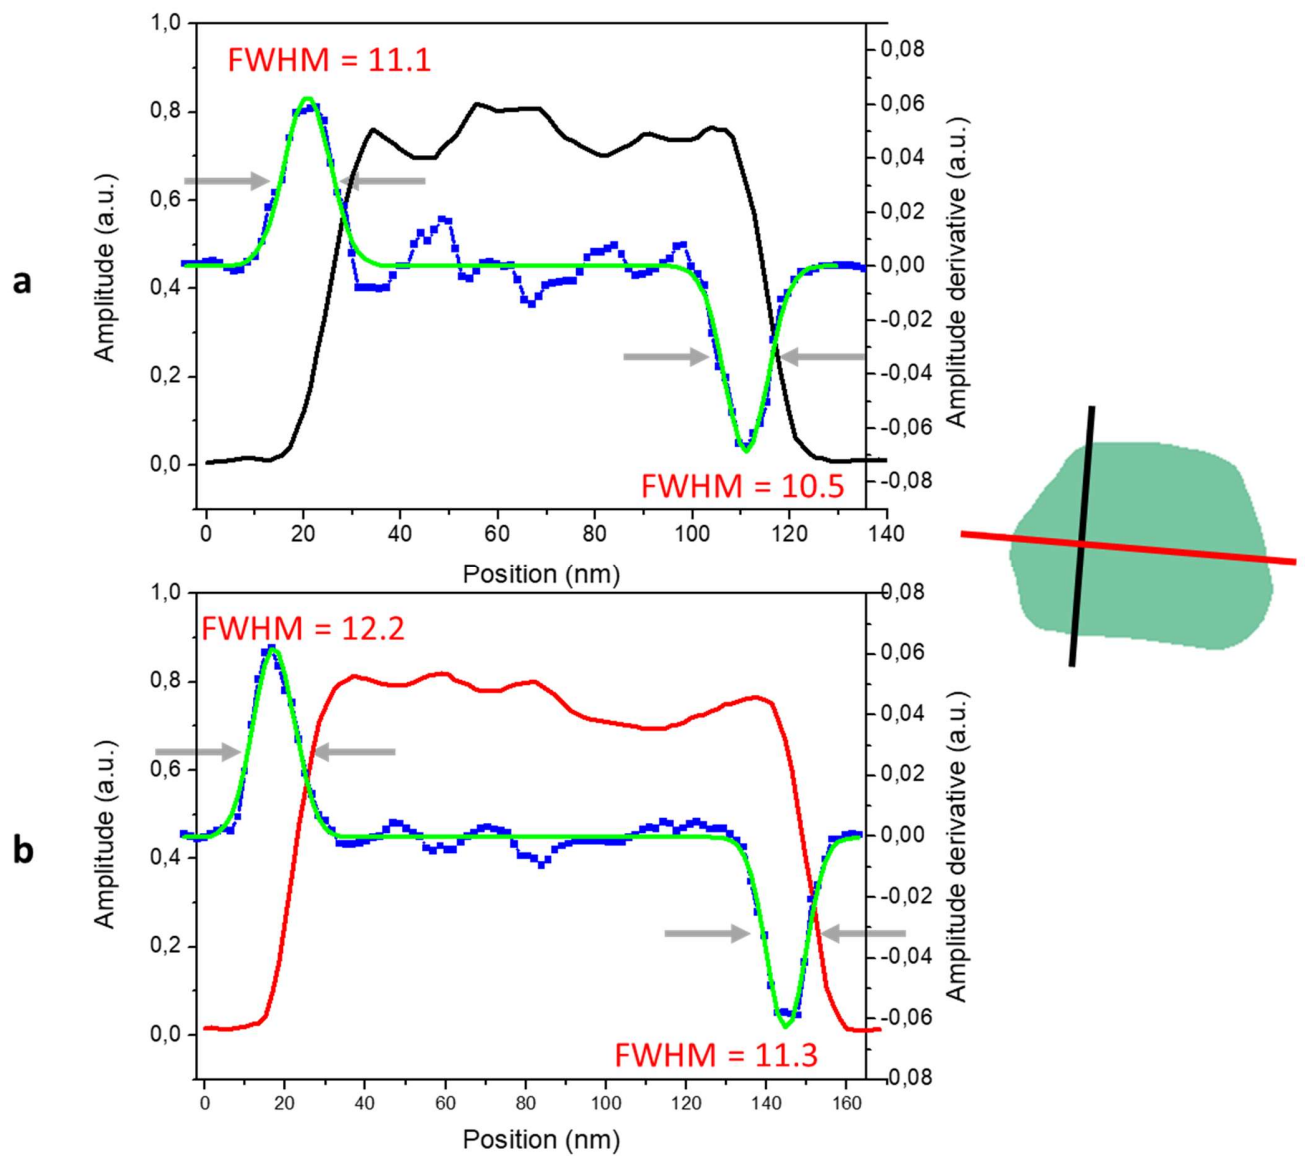

**Fig. S3.** Averaged line profiles. Lines (a, black) along the vertical and (b, red) horizontal directions of the particle cross-section corresponding to Figure 3 (shown here as green surface). The derivatives of the line scans are showing that the reconstruction resolution is 12 nm.

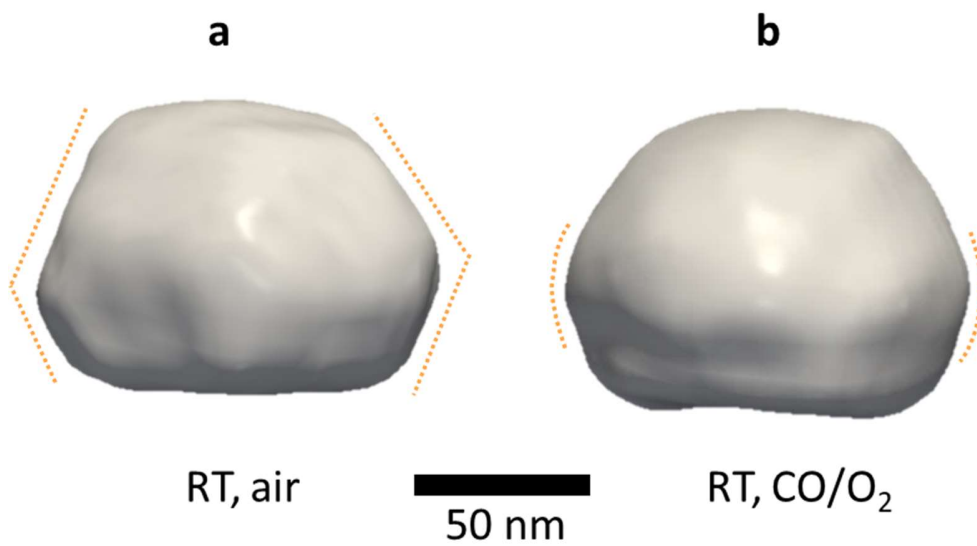

**Fig. S4.** *In situ* Bragg coherent X-ray diffraction imaging. A grey isosurface (30 %) representing the particle shape of the same Au/TiO<sub>2</sub> nanoparticle in side view at RT under air (a) and under CO/O<sub>2</sub> (b). The dash lines are showing the faceted and rounder shapes of the nanoparticle.

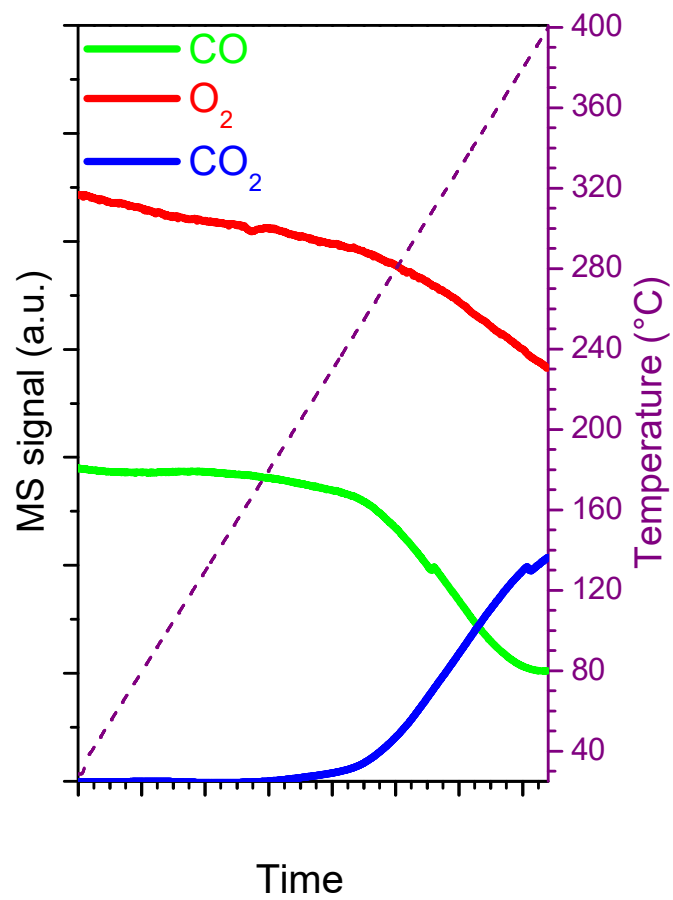

**Fig. S5.** Mass spectrometry signal of O<sub>2</sub>, CO and CO<sub>2</sub> during a separate experiment, heating the gold catalyst inside the CDI cell.<sup>3</sup>

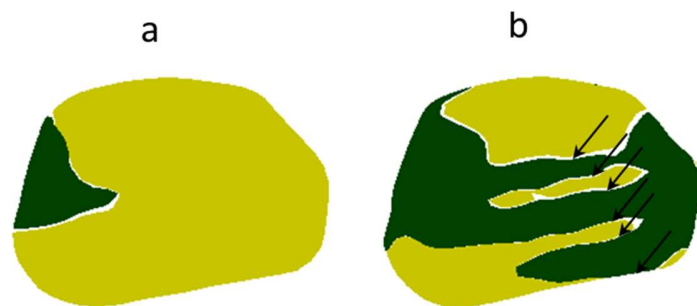

**Fig. S6.** Displacement map from a cross section of the Au nanocrystal at 200 and 400 °C under CO/O<sub>2</sub>. Cross section of the distribution of the low (yellow) and high (green) phase shift of the same Au/TiO<sub>2</sub> nanoparticle under CO/O<sub>2</sub> at 200 °C (a) and 400 °C (b). The black arrows indicate the position of the nanotwin network.

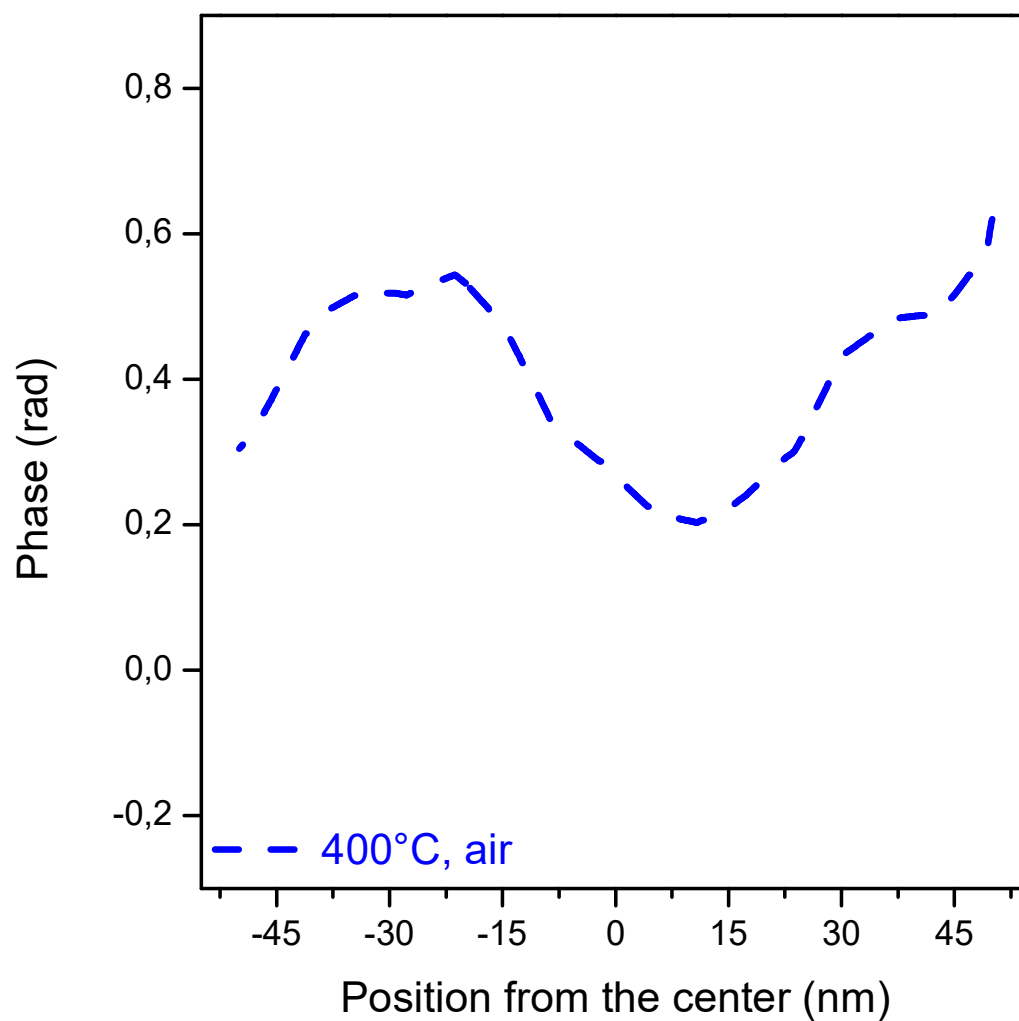

**Fig. S7.** Line scan of the phase at 400 °C under air. The line scan is corresponding to the values of the position of the dashed line shown (for 400 °C under CO/O<sub>2</sub>) in Fig. 2a.

#### References:

- 1 I. Robinson, *J. Phys. Soc. Japan*, 2013, **82**, 1.
- 2 W. Haiss, *Reports Prog. Phys.*, 2001, **64**, 591.
- 3 A. Rochet, A. F. Suzana, A. R. Passos, T. Kalile, F. Berenguer, C. V. Santilli, S. H. Pulcinelli and F. Meneau, *Catal. Today*, 2018, **in press**, 10.1016/j.cattod.2018.12.020.
